# Supplementary material
Source: PubMed Central journal article supplement (PMC8497409)
Supplement: NIHMS1716104-supplement-supinfo.pdf [file NIHMS1716104-supplement-supinfo.pdf]

Supplemental Table S1. *Characteristics of each Study Included in the Review.*

| Study           | Field | Region      | Hospital type               | Age group       | Health criteria           | N    | Age: m(SD)  | Race/ ethnicity                               | Sex       |
|-----------------|-------|-------------|-----------------------------|-----------------|---------------------------|------|-------------|-----------------------------------------------|-----------|
| Altfeld 2013    | IP    | USA         | University                  | 65+             | D/c with 7+ meds          | 720  | 74.5 (6.9)  | W: 49.2%<br>AA: 45.6%<br>O: 5.2%              | NR        |
| Balaban 2015    | IP    | USA         | Academic, public safety-net | General medical | 1+ readmit risk factor    | 1510 | 64.7 (16.3) | W: 57.5%<br>AA: 15.8%<br>H: 15.7%<br>O: 11.0% | NR        |
| Barker 2012     | IP    | Australia   | Public teaching             | CHF             | 4+ meds, 48h LOS          | 120  | 72.6 (10.1) | NR                                            | F: 54.2%  |
| Basger 2015     | PH    | Australia   | Private                     | 65+             | 5+ meds                   | 216  | 81.5 (7.1)  | NR                                            | F: 77.3%  |
| Beck 2015       | IP    | Denmark     | University                  | 70+             | Nutritional risk          | 71   | 85.0 (6.8)  | NR                                            | F: 67.6%  |
| Brovold 2013    | PT    | Norway      | University                  | 70+             | Acute medical             | 115  | 78.0 (5.2)  | NR                                            | F: 60.9%  |
| Buurman 2016    | IP    | Netherlands | Teaching                    | 65+             | 48h LOS, risk for FD      | 674  | 79.9 (7.6)  | NR                                            | M: 42.1%  |
| Clemson 2016    | IP    | Australia   | NR                          | 70+             | No CI                     | 400  | 80.5 (6.1)  | NR                                            | F: 61.8%  |
| Coleman 2006    | IP    | USA         | Nonprofit health system     | 65+             | One of several conditions | 750  | 76.2 (7.0)  | W: 88.7%<br>AA: 4.5%<br>H: 6.8%               | F: 50.3%  |
| Courtney 2009   | IP    | Australia   | Tertiary referral           | 65+             | 1+ readmit risk factor    | 122  | 78.8 (6.9)  | NR                                            | F: 62.3%  |
| DelSindaco 2007 | MD    | Italy       | NR                          | 70+             | Admitted due to CHF       | 173  | 77.5 (5.8)  | NR                                            | M: 52.0%  |
| Edmans 2013     | IP    | UK          | NR                          | 70+             | Health risks              | 433  | 83.0 (6.8)  | W: 96.3%                                      | F: 63.3%  |
| Feldblum 2011   | IP    | Israel      | University                  | 65+             | Nutritional risk          | 259  | 75.2 (5.8)  | NR                                            | M: 43.6%  |
| Finlayson 2018  | IP    | Australia   | Tertiary                    | 65+             | 1+ readmit risk factor    | 222  | 77.6 (6.6)  | NR                                            | F: 73.0%  |
| Gallagher 2003  | NU    | Australia   | Tertiary, Community         | any Female      | Cardiac                   | 196  | 67.5 (11.1) | NR                                            | F: 100.0% |
| Gilbert 2020    | IP    | France      | University and general      | 75+             | 2+ readmit risk factor    | 705  | 86.9 (5.4)  | NR                                            | F: 63.5%  |
| Koelling 2005   | IP    | USA         | University                  | CHF             | LVEF                      | 223  | 64.8 (14.2) | AA: 21.1%                                     | F: 42.2%  |
| Konradsen 2017  | NU    | Denmark     | Medium-sized                | General medical | Constipation risk         | 59   | 72.0 (17.1) | NR                                            | F: 59.3%  |
| Lainscak 2013   | IP    | Slovenia    | Pulmonary                   | COPD            | Pulmonary function        | 253  | 71 (9)      | NR                                            | M: 71.9%  |
| Legrain 2011    | MD    | France      | University                  | 70+             | LOS 5+ days               | 665  | 86.1 (6.2)  | NR                                            | F: 66.0%  |

|                |    |           |                        |                 |                                |      |             |                                             |           |
|----------------|----|-----------|------------------------|-----------------|--------------------------------|------|-------------|---------------------------------------------|-----------|
| Li 2017        | IP | China     | Large tertiary         | CHF             | PA limitations                 | 78   | 77.0 (4.0)  | NR                                          | M: 69.2%  |
| Linden 2014    | IP | USA       | Acute and tertiary     | CHF, COPD       | None reported                  | 512  | 66.8 (12.0) | NR                                          | F: 57.6%  |
| Lindhardt 2019 | IP | Denmark   | University             | 65+             | None reported                  | 330  | 75 (6.9)    | NR                                          | M: 45.8%  |
| Low 2017       | IP | Singapore | Large tertiary         | General medical | Readmit risk                   | 840  | 70.4 (13.6) | C: 69.0%<br>M: 14.8%<br>I: 14.2%<br>O: 2.0% | M: 48.8%  |
| Mcdonald 2002  | IP | Ireland   | University             | CHF             | None reported                  | 98   | 70.8 (10.5) | NR                                          | M: 66.3%  |
| Meisinger 2013 | IP | Germany   | Tertiary               | 65+             | MI                             | 329  | 75.4 (6.0)  | NR                                          | M: 62.0%  |
| Naylor 2004    | IP | USA       | Academic, community    | 65+             | CHF                            | 239  | 76.0 (6.7)  | W: 64.0%<br>AA: 36.0%                       | M: 42.7%  |
| Pardessus 2002 | IP | France    | Geriatric              | 65+             | Admitted for fall              | 60   | 83.2 (7.8)  | NR                                          | F: 78.3%  |
| Parry 2009     | IP | USA       | Community              | 65+             | One of several diagnoses       | 98   | 81.7 (NR)   | W: 88.8%<br>AA: 1.0%<br>H: 10.2%            | F: 68.3%  |
| Pederson 2016  | MD | Denmark   | University             | 75+             | Nutritional risk               | 208  | 86.1 (5.7)  | NR                                          | F: 83.2%  |
| Preen 2005     | IP | Australia | Tertiary               | Chronic illness | Cardiac or respiratory         | 189  | 75.1 (10.9) | NR                                          | F: 60.8%  |
| Rytter 2010    | IP | Denmark   | NR                     | 78+             | LOS 2+ days                    | 293  | NR          | NR                                          | F: 66.2%  |
| Sunde 2020     | IP | Norway    | General                | 65+             | Mobility risk                  | 88   | 78.3 (5.5)  | NR                                          | F: 48.9%  |
| Terp 2018      | IP | Denmark   | University             | 65+             | Nutritional risk               | 144  | 87.5 (6)    | NR                                          | F: 77.8%  |
| Thygesen 2015  | IP | Denmark   | University             | 65+             | Readmit risk factors           | 531  | 77.8 (7.6)  | NR                                          | F: 48.0%  |
| Timonen 2002   | IP | Finland   | Primary-care hospital  | 75+             | Difficult mobility, acute care | 68   | 83.1 (3.9)  | NR                                          | F: 100.0% |
| Van Spall 2019 | IP | Canada    | Tertiary or quaternary | CHF             | None                           | 2494 | 77.7 (12.1) | NR                                          | M: 50.0%  |
| Vogler 2009    | IP | Australia | NR                     | 65+             | No CI                          | 180  | 80.0 (6.9)  | NR                                          | F: 79.4%  |
| Wakefield 2008 | IP | USA       | Veterans               | CHF             | Admit for CHF                  | 148  | 69.3 (9.6)  | W: 93.9%<br>AA: 3.4%<br>NA: 2.7%            | M: 98.6%  |
| Wong 2008      | IP | China     | NR                     | General medical | Readmitted in 28 days          | 332  | 70.5 (12.2) | NR                                          | M: 54.2%  |

|           |    |       |               |                 |              |     |              |    |          |
|-----------|----|-------|---------------|-----------------|--------------|-----|--------------|----|----------|
| Wong 2011 | IP | China | Acute general | 60+             | No severe CI | 555 | Range: 77-97 | NR | M: 51.4% |
| Wong 2014 | IP | China | Acute general | General medical | No severe CI | 610 | Range: 60-95 | NR | M: 47.5% |
| Yu 2015   | IP | China | University    | 60+             | CHF, no CI   | 178 | 78.6 (6.9)   | NR | M: 51.1% |
| Zhao 2009 | NU | China | Comprehensive | 60+             | Angina or MI | 200 | 72.2 (5.4)   | NR | F: 51.0% |

Note: IP=interprofessional; PH=pharmacy; PT=physical therapy; MD=medicine; NU=nursing; CHF=congestive heart failure; LOS=length of stay; FD=functional decline; CI=cognitive impairment; PA=physical activity; MI=myocardial infarction; W=white, Caucasian; AA=black or African American; H= Hispanic; C=Chinese; M=Malay; I=Indian; NA=Native American; O=another race/ethnicity; F=female; NR=not reported

Supplemental Table S2. *Definitions of each Transitional Care Component.*

| Component                          | Definitions                                                                                                                                                                                                                                                                                                                                                                                                                                                                                                  |
|------------------------------------|--------------------------------------------------------------------------------------------------------------------------------------------------------------------------------------------------------------------------------------------------------------------------------------------------------------------------------------------------------------------------------------------------------------------------------------------------------------------------------------------------------------|
| Care continuity and coordination   | <ul style="list-style-type: none"> <li>-Help coordinate follow-up medical care and appointments</li> <li>-Improving communication between providers</li> <li>-Contact with community pharmacists</li> <li>-Discharge planning or writing and sharing of discharge note</li> <li>-Using medical record for cross-site communication</li> <li>-Support navigation of health system or patient hotline</li> <li>-Referring patient back to hospital when needed</li> <li>-Other coordination of care</li> </ul> |
| Medication management              | <ul style="list-style-type: none"> <li>-Medication review and assistance with medication self-management</li> <li>-Address medication problems, including drug-related problems</li> <li>-Identify expired medications or check family medicine cabinet</li> <li>-Address medication adherence and barriers</li> <li>-Medication education or counseling</li> </ul>                                                                                                                                          |
| Symptom recognition                | <ul style="list-style-type: none"> <li>-Address knowledge of ‘red flags’ or attention to signs and symptoms</li> <li>-Daily symptom monitoring with symptom alerts</li> <li>-Symptom driven action plans, such as if symptoms worsen</li> <li>-Education regarding when to contact health professionals</li> </ul>                                                                                                                                                                                           |
| Older adult engagement             | <ul style="list-style-type: none"> <li>-Encouraging patients to take active role in medical care</li> <li>-Maintaining personal health record</li> <li>-Active involvement in discharge planning</li> <li>-Identifying and incorporating patient priorities/goals into treatment plan</li> <li>-Mutual goal setting with review and support of progress</li> </ul>                                                                                                                                           |
| Community and social services      | <ul style="list-style-type: none"> <li>-Assess patient needs and adequacy of social support</li> <li>-Connecting to or activating appropriate community and social services</li> <li>-Follow-up on social service needs</li> </ul>                                                                                                                                                                                                                                                                           |
| Self-management                    | <ul style="list-style-type: none"> <li>-Provide support and information for patient self-management</li> <li>-Identify opportunities for patient’s self-management</li> <li>-Incorporate mutual goal setting for self-management</li> <li>-Provide equipment for monitoring, such as blood pressure, weight</li> <li>-Education on health-related lifestyle and adherence</li> </ul>                                                                                                                         |
| Nutrition                          | <ul style="list-style-type: none"> <li>-Nutritional assessment and develop nutritional care plan</li> <li>-Dietician assessment of intake, needs, and goals</li> <li>-Nutritional counseling</li> <li>-Nutritional and meal behavior to improve appetite and intake</li> <li>-Providing nutritional supplements</li> </ul>                                                                                                                                                                                   |
| Function                           | <ul style="list-style-type: none"> <li>-Follow-up on functional abilities</li> <li>-Functional assessment and goal setting</li> <li>-Training and motivational interviewing in activities of daily living</li> <li>-Performance of ADLs and IADLs</li> <li>-Testing and training in mobility and transferring</li> </ul>                                                                                                                                                                                     |
| Home environment and accessibility | <ul style="list-style-type: none"> <li>-Check on adjustment to home environment and inquire about needs</li> <li>-Assess availability of nursing and home care equipment</li> <li>-Test and installation of aids at home</li> </ul>                                                                                                                                                                                                                                                                          |

|                                     |                                                                                                                                                                                                                                                                                                                                                                                                          |
|-------------------------------------|----------------------------------------------------------------------------------------------------------------------------------------------------------------------------------------------------------------------------------------------------------------------------------------------------------------------------------------------------------------------------------------------------------|
|                                     | <ul style="list-style-type: none"> <li>-Assess safety of the home environment</li> <li>-Environmental hazard identification and removal</li> </ul>                                                                                                                                                                                                                                                       |
| Exercise                            | <ul style="list-style-type: none"> <li>-Individualized exercise program</li> <li>-Aerobic exercise or walking program</li> <li>-Upper and lower extremities exercise, included resistance exercises</li> <li>-Balance, strength, flexibility training</li> <li>-Functional exercises like sit to stand or seated exercises</li> </ul>                                                                    |
| Disease management                  | <ul style="list-style-type: none"> <li>-Management of geriatric conditions</li> <li>-Treatment adherence, advice, and therapy optimization</li> <li>-Assessment of medical condition to identify problems and intervene</li> <li>-Management of risk factors or needs related to medical conditions</li> <li>-Management of multiple chronic illnesses</li> <li>-Disease management education</li> </ul> |
| Older adult education               | <ul style="list-style-type: none"> <li>-Educational and behavioral strategies to address learning needs</li> <li>-Health teaching and coaching</li> <li>-Health literacy assessment</li> </ul>                                                                                                                                                                                                           |
| Psychological and emotional support | <ul style="list-style-type: none"> <li>-Coping and adjustment</li> <li>-Perceptions of control, self-efficacy, and social support</li> <li>-Motivational interviewing</li> <li>-Self-efficacy enhancement strategies such as encouraging support group use and realistic goal setting</li> </ul>                                                                                                         |
| Caregiver education                 | <ul style="list-style-type: none"> <li>-Assess cg competency</li> <li>-Educational and behavioral strategies to address learning needs</li> </ul>                                                                                                                                                                                                                                                        |
